# Supplementary material for: One-pot synthesis and postpolymerization functionalization of cyclic carbonate/epoxide-difunctional polycarbonates prepared by regioselective diepoxide/CO2 copolymerization
Source: Royal Society of Chemistry journal article supplement (doi:10.1039/c6py00563b), 2016-01-01
Supplement: c6py00563b1.pdf [file c6py00563b1.pdf]

## SUPPORTING INFORMATION

### One-Pot Synthesis and Postpolymerization Functionalization of Cyclic Carbonate/Epoxide-Difunctional Polycarbonates Prepared by Regioselective Diepoxide/CO<sub>2</sub> Copolymerization

Bing Han,<sup>a</sup> Li Zhang,<sup>a</sup> Hongye Zhang,<sup>a</sup> Huining Ding,<sup>a</sup> Binyuan Liu<sup>\*a</sup> and Xianhong Wang<sup>\*b</sup>

<sup>a</sup> Department of Polymer Science and Engineering, Hebei University of Technology, Tianjin 300130, China

E-mail: byliu@hebut.edu.cn

<sup>b</sup> Key Laboratory of Polymer Ecomaterials, Changchun Institute of Applied Chemistry, Chinese Academy of Sciences, Changchun 130022, China. E-mail: xhwang@ciac.jl.cn

| Table of Contents                                                                                                                                                             | Page |
|-------------------------------------------------------------------------------------------------------------------------------------------------------------------------------|------|
| 1. General Materials.....                                                                                                                                                     | S2   |
| 2. Characterization.....                                                                                                                                                      | S2   |
| 3. General Copolymerization of VCHDEP and CO <sub>2</sub> .....                                                                                                               | S2-3 |
| 4. Hydrolysis of Side Epoxides Functional Group on the Copolymer.....                                                                                                         | S3   |
| 5. Aminolysis of the polymer obtained by the hydrolysis of copolymer.....                                                                                                     | S3   |
| 6. Azidolysis and Aminolysis of the polymer by sodium azide and <i>n</i> -propylamine.....                                                                                    | S3   |
| 7. References.....                                                                                                                                                            | S4   |
| 8. Table S1 Solubility of copolymers .....                                                                                                                                    | S5   |
| 9. Fig.S1 IR spectrum of cross-linked copolymer obtained from salenCrCl/DMAP(1:5) binary catalyst.....                                                                        | S5   |
| 10. Scheme S1 The possible formation of cross-linked copolymer process in the copolymerization of VCHEP and CO <sub>2</sub> .....                                             | S6   |
| 11. Fig. S2 <sup>13</sup> C NMR spectrum of copolymer of 4-vinyl-1-cyclohexene diepoxide and CO <sub>2</sub> .....                                                            | S7   |
| 12. Fig. S3 GPC curves of polycarbonates.....                                                                                                                                 | S7   |
| 13. Fig. S4 <sup>1</sup> H NMR spectrum of the cyclic carbonate- and epoxide-difunctionalized polycarbonate obtained at 0.5MPa.....                                           | S8   |
| 14. Fig. S5 The DSC curve for sample of entry 9 in Table 1.....                                                                                                               | S8   |
| 15. Fig. S6 IR spectra of original functional APC precursor of entry 9 in Table 1 (A) and modified by azidolysis and then <i>n</i> -propylene amine (B) .....                 | S9   |
| 16. Fig. S7 <sup>1</sup> H NMR spectra of original functional APC precursor of entry 9 in Table 1 (A) and modified by azidolysis and then <i>n</i> -propylene amine (B) ..... | S9   |

## 1. General Materials.

Unless otherwise special, all reagents were purchased from commercial suppliers and used without further purification. All manipulations involving air- and/or water-sensitive compounds were carried out with the standard Schlenk and vacuum line techniques under argon atmosphere. 4-vinyl-1-cyclohexene diepoxide (VCHDEP) was stirred over powdered  $\text{CaH}_2$  at room temperature over 48 h and vacuum-distilled before use. Bis(triphenylphosphine) iminium chloride ( $[\text{PPN}]^+ = [\text{Ph}_3\text{P}-\text{N}=\text{PPh}_3]^+$ ) (PPNCl) (Acros) was dissolved in acetone, precipitated by an excess amount of ether, and then the precipitate was dried under vacuum. SalenCrCl (salen- $\text{H}_2=\text{N}$ , *N*-bis(3,5-*di-tert*-butylsalicylidene)-1,2-cyclohexanediamine) was purchased from Acros and used directly. 4-dimethylaminopyridine (DMAP) was recrystallized from toluene and dried before use. (ONSO)CrCl complexes were synthesized as described in our previous work.<sup>1</sup> Carbon dioxide (99.995% purity) was used without further purification.

## 2. Characterization

$^1\text{H}$  and  $^{13}\text{C}$  NMR spectra were recorded on a Bruker-400 spectrometer at frequencies of 400 MHz ( $^1\text{H}$ ) and 100 MHz ( $^{13}\text{C}$ ), respectively. Their peak frequencies were referenced versus an internal standard (TMS) shifts at 0 ppm for  $^1\text{H}$  NMR and against the solvent. Infrared (IR) spectra were obtained on a Bruker Vector 22 spectrometer at a resolution of  $4\text{ cm}^{-1}$  (16 scans collected). The glass transition temperature ( $T_g$ ) of copolymers were determined at a heating rate of  $10\text{ }^\circ\text{C}/\text{min}$  on Perkin-Elmer Diamond Differential Scanning Calorimetry instrument. Thermogravimetric analyses (TGA) were performed on a TA Instruments SDT/Q 600 at a scanning speed of  $10\text{ }^\circ\text{C}/\text{min}$  (from room temperature to  $400\text{ }^\circ\text{C}$ ) under a nitrogen atmosphere with a purge rate of  $80\text{ mL}/\text{min}$ . Molecular weight of polymer was determined by using gel permeation chromatography (GPC) on a PL-GPC 220 instrument with a refractive index detector, calibrated with polystyrene standards. The columns used was MIXED-B  $300\times 7.5\text{ mm}$  columns held at  $40\text{ }^\circ\text{C}$ , using THF as eluent at a flow rate of  $1.0\text{ mL}/\text{min}$ .

**General Copolymerization of VCHDEP and  $\text{CO}_2$ .** The copolymerizations were carried out in a 100 mL stainless-steel autoclave equipped with a magnetic stirrer. Desired amounts of (ONSO)CrCl/PPNCl or salenCrCl/DMAP (1:5 molar ratio) were transferred into the dried autoclave and dried at  $60\text{ }^\circ\text{C}$  for 2 h

under vacuum. The autoclave was heated to the target temperature in a pre-heated oil bath, filled with CO<sub>2</sub> to a set pressure and was kept stirring for the desired time. After the reaction, the unreacted CO<sub>2</sub> was slowly released. Then the methanol was added. The solid was filtered and washed with hot methanol three times. The whole methanol solution were collected. The isolated solid was dried at 45 °C in vacuum. The dried copolymer was subjected to NMR analysis. The pendant cyclic carbonate (CC) and epoxide (EP) functional groups along the polycarbonate chain were calculated according to <sup>1</sup>H NMR data. The formula is as follows: CC/EP=[1-(7A<sub>2.59-2.81</sub>/3A<sub>1.00-2.25</sub>)]/[7A<sub>2.59-2.81</sub>/3A<sub>1.00-2.25</sub>].

In addition, the whole collected-methanol solution was condensed under vacuum to remove the methanol. The residual solution was subjected to the <sup>1</sup>H NMR for the determination of percentage of cyclic carbonate A and B and unreacted diepoxide. According to the the percentage and mass of residual solution, the mass and TOF of the cyclic carbonate A and B were estimated.

**Hydrolysis of side epoxides functional group on the copolymer.**<sup>2</sup> Copolymer (CC/EP =50/50,  $M_n=4,300$  g mol<sup>-1</sup>, MWD=6.48) (1.24 g) was dissolved in 8.0 mL DMSO and 1.5 mL HCl aq (1mol/L ) was added, and the mixture was stirred for 9 h at 25 °C. After the reaction, the mixture was poured into a saturated aqueous solution of NaHCO<sub>3</sub> (100 mL) and the precipitate was washed with water three times and then deeped in 100 mL methanol for 6 h. The precipitate was collected by filtration and dried at 60 °C under reduced pressure.

**Aminolysis of the polymer obtained by the hydrolysis of copolymer.**<sup>2</sup> The polymer obtained by the aforementioned hydrolysis (0.63 g) was dissolved in DMSO (6.0 mL) and *n*-propylamine (0.80g, 15 mmol) was added. The mixture was stirred for 24 h at 70 °C. After the reaction, the mixture was poured into 50 ml diethyl ether. The precipitate was collected by filtration and washed with water. The isolated solid was dried at 70 °C under reduced pressure.

**Azidolysis and aminolysis of the polymer by sodium azide and *n*-propylamine.** The azidolysis the copolymer was accoring to the slightly modified procedure.<sup>3</sup> 0.62 g copolymer (CC/EP =50/50,  $M_n=4,300$  g mol<sup>-1</sup>, MWD=6.48) was dissolved in 15 mL of dried DMF. Sodium azide (0.29 g, 4.5 mmol) and

ammonium chloride (0.24 g, 4.5 mmol) were added to the solution, and the mixture was stirred at 50 °C for 24 h.

The above mixture was filtrated and the solution was added *n*-propylamine (0.80g, 15 mmol). After stirred at 70 °C for 24 h, the solution was poured into 100 mL diethyl ether. The precipitate was filtrated, washed with water, and dried at 70 °C under vacuum.

## References

1. B. Han, L. Zhang, S. J. Kyran, B. Y.Liu, and D. J. Darensbourg, *J. Polym. Sci., Part A: Polym. Chem.*, 2016, DOI:10.1002/pola.28052.
2. B. Ochiai, Y. Hatano, and T. Endo, *Macromolecules* 2008, **41**, 9937-9939
3. C. Z. Zhao, D. X. Wu, X. M. Lian, Y. Zhang, X. H. Song, and H. Y. Zhao, *J. Phys. Chem. B*, 2010, **114**, 6300–6308

| Entry | Cross-linked | CHCl <sub>3</sub> | DMSO | DMF | THF | Acetone | toluene | CH <sub>3</sub> OH | Diethyl Ether |
|-------|--------------|-------------------|------|-----|-----|---------|---------|--------------------|---------------|
| 1     | ×            | ✓                 | ✓    | ✓   | ✓   | ✓       | ×       | ×                  | ×             |
| 2     | ×            | ✓                 | ✓    | ✓   | ✓   | ✓       | ×       | ×                  | ×             |
| 3     | ×            | ✓                 | ✓    | ✓   | ✓   | ✓       | ×       | ×                  | ×             |
| 4     | ×            | ✓                 | ✓    | ✓   | ✓   | ✓       | ×       | ×                  | ×             |
| 5     | ×            | ✓                 | ✓    | ✓   | ✓   | ✓       | ×       | ×                  | ×             |
| 6     | ✓            | ×                 | ×    | ×   | ×   | ×       | ×       | ×                  | ×             |
| 7     | ×            | ✓                 | ✓    | ✓   | ✓   | ✓       | ×       | ×                  | ×             |
| 8     | ✓            | ×                 | ×    | ×   | ×   | ×       | ×       | ×                  | ×             |
| 9     | ×            | ✓                 | ✓    | ✓   | ✓   | ✓       | ×       | ×                  | ×             |
| 10    | ×            | ✓                 | ✓    | ✓   | ✓   | ✓       | ×       | ×                  | ×             |

**Table S1 Solubility of copolymers**

Conditions: 5 mg copolymer, 2 mL solvent, 25°C. “×” insoluble, “✓”soluble. The order of Entry is correspondindg to number in the Table 1.

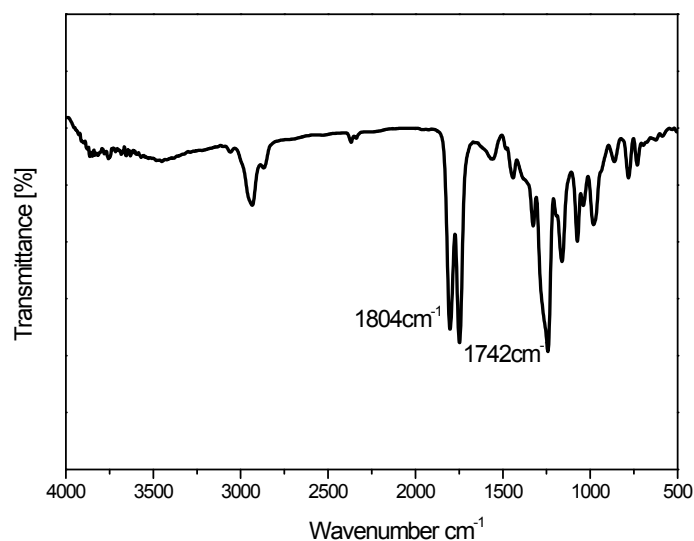

**Fig. S1.** IR spectrum of cross-linked copolymer obtained from SalenCrCl/DMAP (1:5) binary catalyst

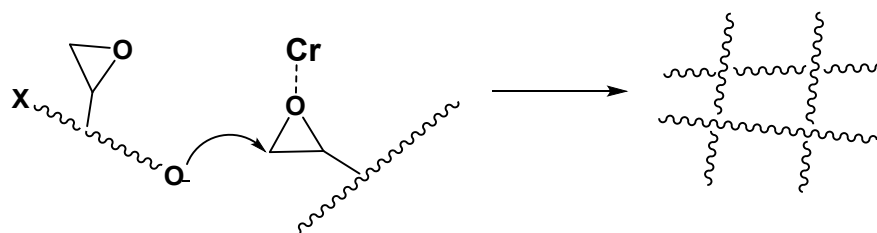

**Scheme S1** The possible formation of cross-linked copolymer process in the copolymerization of VCHEP and CO<sub>2</sub>

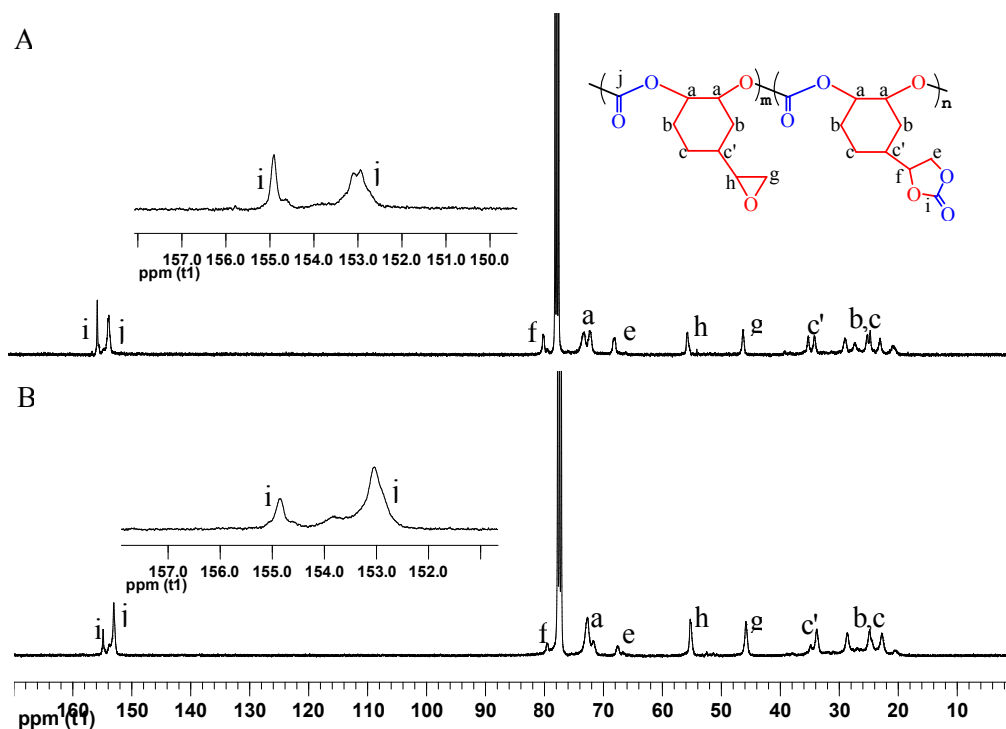

**Fig. S2**  $^{13}\text{C}$  NMR of copolymer of 4-vinyl-1-cyclohexene diepoxide and  $\text{CO}_2$   
(A: Entry 9 in Table 1; B: Entry 2 in Table 1)

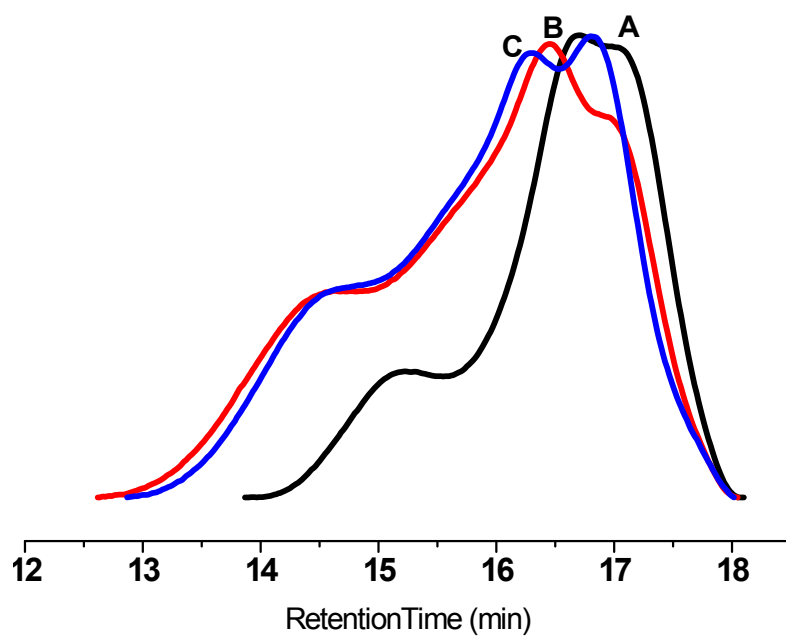

**Fig. S3** GPC curves of polycarbonate of entry 1 (A), entry 2 (B), and entry 3 (C) in Table 1

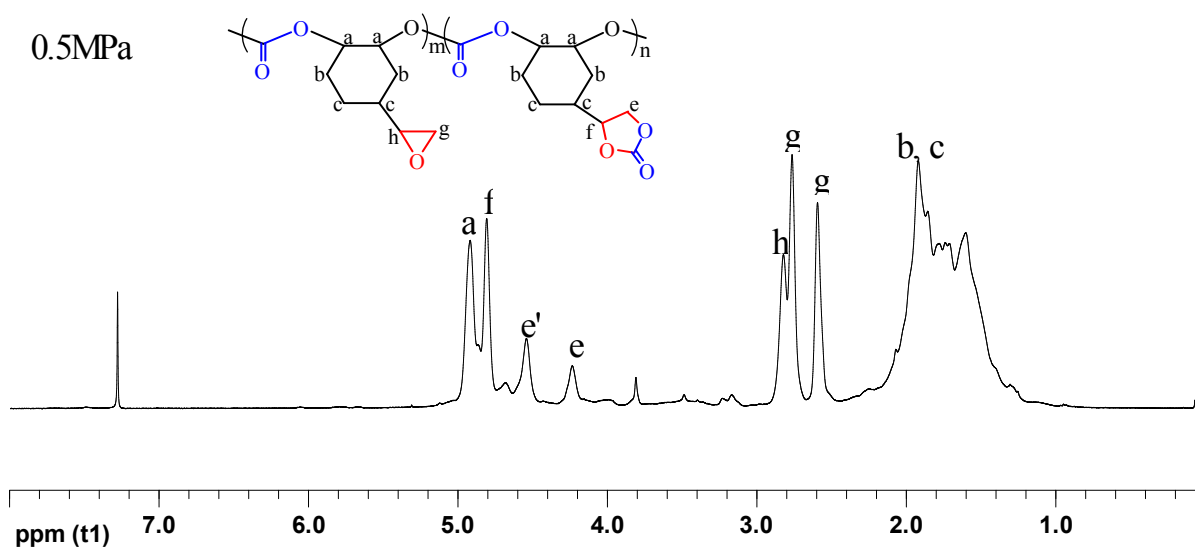

**Fig. S4**  $^1\text{H}$  NMR spectrum of the cyclic carbonate- and epoxide-difunctionalized polycarbonate obtained at 0.5 MPa (Entry 1, Table 1)

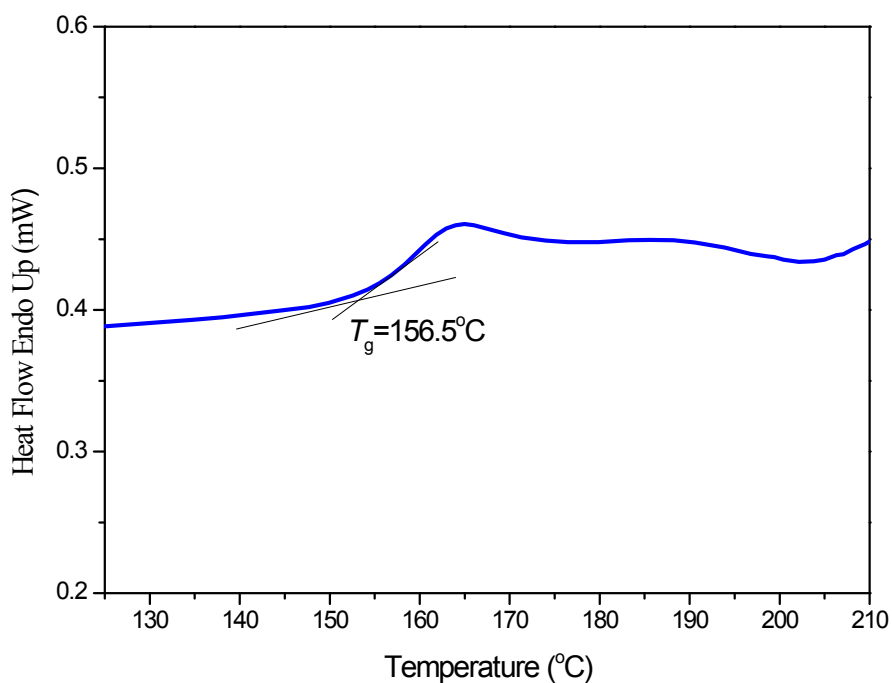

**Fig. S5** The DSC curve for sample of entry 9 in Table 1 (heating rate  $10^\circ\text{C}/\text{min}$  )



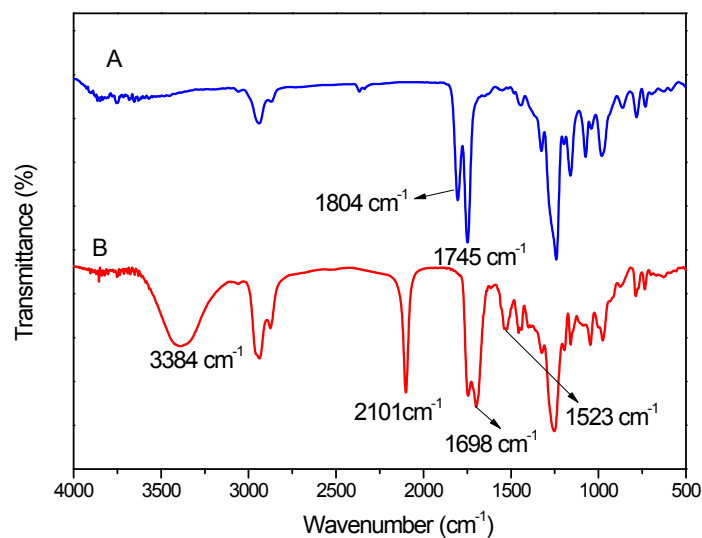

**Fig. S6** IR spectra of original functional APCs precursor of entry 9 in Table 1 (A) and modified by sodium azide and *n*-propylene amine (B).

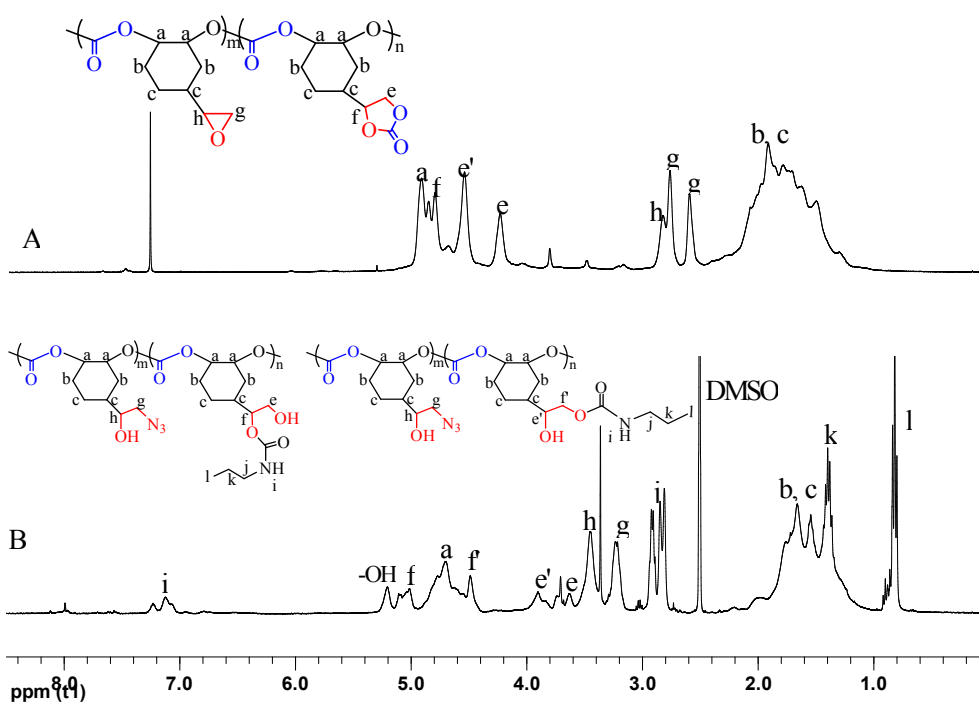

**Fig. S7**  $^1\text{H}$  NMR spectra of original functional APC precursor of entry 9 in Table 1 (A) and modified by sodium azide and then *n*-propylene amine (B).
